# Supplementary material for: Features of Studies on Transition Interventions for Childhood Cancer Survivors: A Scoping Review
Source: MDPI journal article supplement (doi:10.3390/cancers16020272), 2024-01-08
Supplement: s1 [file s1]

Table S1-keywords and subject headings

| General Population of Interest                                                                                                                                                                                                                                                                                                                      | Cancer survivors Terms                                                                                                                                                                                                                                                                                                                                                                                                                                        | Transition Terms                                                                                                                                                                                                                                                                                                                                                                                                                                                                                                                                                                                                                                                                                                                                                                                                                                                                                                                                                                                                                                                                                                                                                                                                                                                                                                                                                                                                                               |
|-----------------------------------------------------------------------------------------------------------------------------------------------------------------------------------------------------------------------------------------------------------------------------------------------------------------------------------------------------|---------------------------------------------------------------------------------------------------------------------------------------------------------------------------------------------------------------------------------------------------------------------------------------------------------------------------------------------------------------------------------------------------------------------------------------------------------------|------------------------------------------------------------------------------------------------------------------------------------------------------------------------------------------------------------------------------------------------------------------------------------------------------------------------------------------------------------------------------------------------------------------------------------------------------------------------------------------------------------------------------------------------------------------------------------------------------------------------------------------------------------------------------------------------------------------------------------------------------------------------------------------------------------------------------------------------------------------------------------------------------------------------------------------------------------------------------------------------------------------------------------------------------------------------------------------------------------------------------------------------------------------------------------------------------------------------------------------------------------------------------------------------------------------------------------------------------------------------------------------------------------------------------------------------|
| 'Young adult*' OR Youth*<br>OR 'Prime adult*' OR<br>'Adolescen*' OR Teen*<br>OR Puberty OR Pubescen*<br>OR Prepuberty OR<br>Prepubescen* OR Preteen*<br>OR Juvenile* OR Child*<br>OR 'Child, Preschool' OR<br>'Preschool*' OR<br>'Pediatric*' OR Paediatric*<br>OR 'Early childhood' OR<br>Infan* OR 'Infant,<br>Newborn' OR Neonat* OR<br>Newborn* | Tumor* OR Neoplas* OR<br>Cancer* OR 'Malignant<br>Neoplasm*' OR Malignanc* OR<br>'Neoplasm*, Malignant' OR<br>'Cancer Survivor*' OR<br>'Survivor*, Cancer' OR 'Long-<br>Term Cancer Survivor*' OR<br>'Cancer Survivor*, Long-Term'<br>OR 'Long Term Cancer<br>Survivor*' OR 'Cancer<br>Survivor*, Long Term' OR<br>'Survivor*, Long-Term Cancer'<br>OR 'Live with cancer*' OR<br>'Live with tumor*' OR 'Live<br>with Neoplasm*' OR 'Live with<br>Malignanc*') | (transition OR 'Health Transition' OR 'Continuity of Patient Care' OR 'Patient Care Continuity'<br>OR 'Continuum of Care' OR 'Care Continuum' OR 'Continuity of Care' OR 'Care Continuity'<br>OR 'Aftercare' OR 'After Care' OR 'After Treatment*' OR 'Follow-Up Care*' OR 'Hospital to<br>Home Transition' OR 'Hospital to Home*' OR 'Patient discharge*' OR 'Discharge Planning*'<br>OR 'Hando* to adult care' OR 'Hand OVER* to adult care' OR 'Hand OUT* to adult care' OR<br>'Signo* to adult care' OR 'Sign OVER* to adult care' OR 'Sign OUT* to adult care' OR<br>'Health transition*' OR 'Healthcare transition*' OR 'Health care transition*' OR 'Nursing<br>hando*' OR 'Patient hando*' OR 'Patient Hand OVER*' OR 'Patient Hand OUT*' OR 'Patient<br>Sign OUT*' OR 'Patient Sign OVER*' OR 'Patient signo*' OR 'Nursing Hando*' OR 'Nursing<br>Hand OVER*' OR 'Nursing Hand OUT*' OR 'Clinical hando*' OR 'Patient transfer*' OR<br>'Transfer* to adult care' OR 'Transition* to adult*' OR 'Transition* to adult care' OR 'Patient<br>Transition*' OR 'Care Transition*' OR 'Transition of Care' OR 'Transition of health Care' OR<br>'Health Care Transition' OR 'Health Care Transitions' OR 'Patient Turfing*' OR 'Patient<br>Dumping' OR 'Care Retention' OR 'Transfer from Pediatric to Adult Care' OR 'Pediatric<br>Transition To Adult Care' OR 'Transfer* to Adult Care' OR 'Transition* Care*' OR 'Home<br>Transition*') |
