# Supplementary material for: Features of Studies on Transition Interventions for Childhood Cancer Survivors: A Scoping Review
Source: MDPI journal article supplement (doi:10.3390/cancers16020272), 2024-01-08
Supplement: s1 [file s1]

Table S2-search strategy in Ovid MEDLINE(R) ALL &lt;2005 to October 17, 2022&gt;

| Number | search strategy                                                                                                   | search results |
|--------|-------------------------------------------------------------------------------------------------------------------|----------------|
| 1      | young adult*.ab. or young adult*.at.                                                                              | 126083         |
| 2      | youth*.ab. or youth*.at.                                                                                          | 99172          |
| 3      | prime adult*.ab. or prime adult*.at.                                                                              | 42             |
| 4      | adolescen*.ab. or adolescen*.at.                                                                                  | 353802         |
| 5      | teen*.ab. or teen*.at.                                                                                            | 35468          |
| 6      | puberty.ab. or puberty.at.                                                                                        | 33388          |
| 7      | pubescen*.ab. or pubesceb*.at.                                                                                    | 3204           |
| 8      | prepuberty.ab. or prepuberty.at.                                                                                  | 770            |
| 9      | prepubescen*.ab. or prepubescen*.at.                                                                              | 1323           |
| 10     | preteen*.ab. or preteen*.at.                                                                                      | 460            |
| 11     | juvenile*.ab. or juvenile*.at.                                                                                    | 96005          |
| 12     | child*.ab. or child*.at.                                                                                          | 1631259        |
| 13     | child, preschool.ab. or child, preschool.at.                                                                      | 36             |
| 14     | preschool*.ab. or preschool*.at.                                                                                  | 34456          |
| 15     | pediatric*.ab. or pediatric*.at.                                                                                  | 414672         |
| 16     | paediatric*.ab. or paediatric*.at.                                                                                | 93072          |
| 17     | early childhood.ab. or early childhood.at.                                                                        | 33535          |
| 18     | infan*.ab. or infan*.at.                                                                                          | 497342         |
| 19     | infant, newborn.ab. or infant, newborn.at.                                                                        | 108            |
| 20     | neonat*.ab. or neonat*.at.                                                                                        | 331869         |
| 21     | newborn*.ab. or newborn*.at.                                                                                      | 167616         |
| 22     | 1 or 2 or 3 or 4 or 5 or 6 or 7 or 8 or 9 or 10 or 11 or 12 or 13 or 14 or 15 or 16 or 17 or 18 or 19 or 20 or 21 | 2780169        |
| 23     | tumor*.ab. or tumor*.at.                                                                                          | 1827065        |
| 24     | neoplasm*.ab. or neoplasm*.at.                                                                                    | 165761         |
| 25     | neoplasia*.ab. or neoplasia*.at.                                                                                  | 72696          |
| 26     | cancer*.ab. or cancer*.at.                                                                                        | 2157315        |
| 27     | malignant neoplasm*.ab. or malignant neoplasm*.at.                                                                | 15963          |
| 28     | neoplasm*, malignant.ab. or neoplasm*, malignant.at.                                                              | 262            |
| 29     | cancer survivor*.ab. or cancer survivor*.at.                                                                      | 24533          |
| 30     | Survivor*, Cancer.ab. or Survivor*, Cancer.at.                                                                    | 555            |
| 31     | long-term cancer survivor*.ab. or long-term cancer survivor*.at.                                                  | 537            |
| 32     | cancer survivor*, long-term.ab. or cancer survivor*, long-term.at.                                                | 51             |
| 33     | Long Term Cancer Survivor*.ab. or Long Term Cancer Survivor*.at.                                                  | 537            |
| 34     | Cancer Survivor*, Long Term.ab. or Cancer Survivor*, Long Term.at.                                                | 51             |
| 35     | Survivor*, Long-Term Cancer.ab. or Survivor*, Long-Term Cancer.at.                                                | 7              |
| 36     | Live with cancer*.ab. or Live with cancer*.at.                                                                    | 73             |
| 37     | Live with tumor*.ab. or Live with tumor*.at.                                                                      | 31             |

|    |                                                                                                                                                    |         |
|----|----------------------------------------------------------------------------------------------------------------------------------------------------|---------|
| 38 | Live with Neoplasm*.ab. or Live with Neoplasm*.at.                                                                                                 | 0       |
| 39 | Live with Malignanc*.ab. or Live with Malignanc*.at.                                                                                               | 0       |
| 40 | Chronic Disease*.ab. or Chronic Disease*.at.                                                                                                       | 85443   |
| 41 | Disease*, Chronic.ab. or Disease*, Chronic.at.                                                                                                     | 8727    |
| 42 | Chronic Illness*.ab. or Chronic Illness*.at.                                                                                                       | 22210   |
| 43 | Illness*, Chronic.ab. or Illness*, Chronic.at.                                                                                                     | 493     |
| 44 | Chronic Condition*.ab. or Chronic Condition*.at.                                                                                                   | 27580   |
| 45 | Condition*, Chronic.ab. or Condition*, Chronic.at.                                                                                                 | 1533    |
| 46 | Live with Chronic Disease*.ab. or Live with Chronic Disease*.at.                                                                                   | 23      |
| 47 | Live with Chronic condition*.ab. or Live with Chronic condition*.at.                                                                               | 18      |
| 48 | 23 or 24 or 25 or 26 or 27 or 28 or 29 or 30 or 31 or 32 or 33 or 34 or 35 or 36 or 37 or 38 or 39 or 40 or 41 or 42 or 43 or 44 or 45 or 46 or 47 | 3439894 |
| 49 | 22 and 48                                                                                                                                          | 194103  |
| 50 | transition*.ab. or transition*.at.                                                                                                                 | 512088  |
| 51 | health transition*.ab. or health transition*.at.                                                                                                   | 741     |
| 52 | continuity of patient care.ab. or Continuity of Patient Care.at.                                                                                   | 442     |
| 53 | Care Continuity, Patient.ab. or Care Continuity, Patient.at.                                                                                       | 7       |
| 54 | Patient Care Continuity.ab. or Patient Care Continuity.at.                                                                                         | 26      |
| 55 | Continuum of Care.ab. or Continuum of Care.at.                                                                                                     | 3569    |
| 56 | Care Continuum.ab. or Care Continuum.at.                                                                                                           | 2375    |
| 57 | Continuity of Care.ab. or Continuity of Care.at.                                                                                                   | 9888    |
| 58 | Care Continuity.ab. or Care Continuity.at.                                                                                                         | 757     |
| 59 | aftercare.ab. or aftercare.at.                                                                                                                     | 4656    |
| 60 | after care.ab. or after care.at.                                                                                                                   | 591752  |
| 61 | after treatment*.ab. or after treatment*.at.                                                                                                       | 1518143 |
| 62 | Follow-Up Care*.ab. or Follow-Up Care*.at.                                                                                                         | 7407    |
| 63 | Care*, Follow-Up.ab. or Care*, Follow-Up.at.                                                                                                       | 8107    |
| 64 | Hospital to Home Transition.ab. or Hospital to Home Transition.at.                                                                                 | 99      |
| 65 | Hospital to Home*.ab. or Hospital to Home*.at.                                                                                                     | 3782    |
| 66 | Home, Hospital to.ab. or Home, Hospital to.at.                                                                                                     | 1028    |
| 67 | Patient discharge*.ab. or Patient discharge*.at.                                                                                                   | 6367    |
| 68 | Discharge, Patient.ab. or Discharge, Patient.at.                                                                                                   | 897     |
| 69 | Discharge Planning*.ab. or Discharge Planning*.at.                                                                                                 | 5612    |
| 70 | Planning*, Discharge.ab. or Planning*, Discharge.at.                                                                                               | 187     |
| 71 | Hando* to adult care.ab. or Hando* to adult care.at.                                                                                               | 0       |
| 72 | Hand O* to adult care.ab. or Hand O* to adult care.at.                                                                                             | 0       |
| 73 | Signo* to adult care.ab. or Signo* to adult care.at.                                                                                               | 0       |
| 74 | Sign O* to adult care.ab. or Sign O* to adult care.at.                                                                                             | 0       |
| 75 | Health transition*.ab. or Health transition*.at.                                                                                                   | 741     |
| 76 | Healthcare transition*.ab. or Healthcare transition*.at.                                                                                           | 222     |

|     |                                                                                        |      |
|-----|----------------------------------------------------------------------------------------|------|
| 77  | Health care transition*.ab. or Health care transition*.at.                             | 398  |
| 78  | Nursing hando*.ab. or Nursing hando*.at.                                               | 254  |
| 79  | Patient hando*.ab. or Patient hando*.at.                                               | 765  |
| 80  | Hando*, Patient.ab. or Hando*, Patient.at.                                             | 97   |
| 81  | Patient Hand O*.ab. or Patient Hand O*.at.                                             | 72   |
| 82  | Hand O*, Patient.ab. or Hand O*, Patient.at.                                           | 73   |
| 83  | Patient Sign O*.ab. or Patient Sign O*.at.                                             | 28   |
| 84  | Sign O*, Patient.ab. or Sign O*, Patient.at.                                           | 30   |
| 85  | Patient signo*.ab. or Patient signo*.at.                                               | 2    |
| 86  | Signo*, Patient.ab. or Signo*, Patient.at.                                             | 2    |
| 87  | Nursing Hando*.ab. or Nursing Hando*.at.                                               | 254  |
| 88  | Hando*, Nursing.ab. or Hando*, Nursing.at.                                             | 17   |
| 89  | Nursing Hand Over*.ab. or Nursing Hand Over*.at.                                       | 2    |
| 90  | Nursing Hand Out*.ab. or Nursing Hand Out*.at.                                         | 0    |
| 91  | Hand Out*, Nursing.ab. or Hand Out*, Nursing.at.                                       | 0    |
| 92  | Hand Over*, Nursing.ab. or Hand Over*, Nursing.at.                                     | 0    |
| 93  | Clinical hando*.ab. or Clinical hando*.at.                                             | 278  |
| 94  | Hando*, Clinical.ab. or Hando*, Clinical.at.                                           | 28   |
| 95  | Patient transfer*.ab. or Patient transfer*.at.                                         | 2721 |
| 96  | Transfer* to adult care.ab. or Transfer* to adult care.at.                             | 283  |
| 97  | Transition* to adult*.ab. or Transition* to adult*.at.                                 | 3347 |
| 98  | Transition* to adult care.ab. or Transition* to adult care.at.                         | 590  |
| 99  | Transfer*, Patient.ab. or Transfer*, Patient.at.                                       | 732  |
| 100 | Patient Transition*.ab. or Patient Transition*.at.                                     | 473  |
| 101 | Transition*, Patient.ab. or Transition*, Patient.at.                                   | 184  |
| 102 | Care Transition*.ab. or Care Transition*.at.                                           | 2837 |
| 103 | Transition*, Care.ab. or Transition*, Care.at.                                         | 3527 |
| 104 | Transition of Care.ab. or Transition of Care.at.                                       | 1503 |
| 105 | Transition of health Care.ab. or Transition of health Care.at.                         | 114  |
| 106 | Health Care Transition.ab. or Health Care Transition.at.                               | 297  |
| 107 | Care Transition*, Health.ab. or Care Transition*, Health.at.                           | 6    |
| 108 | Health Care Transitions.ab. or Health Care Transitions.at.                             | 103  |
| 109 | Transition*, Health Care.ab. or Transition*, Health Care.at.                           | 104  |
| 110 | Patient Turfing*.ab. or Patient Turfing*.at.                                           | 0    |
| 111 | Turfing*, Patient.ab. or Turfing*, Patient.at.                                         | 0    |
| 112 | Patient Dumping.ab. or Patient Dumping.at.                                             | 54   |
| 113 | Dumping, Patient.ab. or Dumping, Patient.at.                                           | 2    |
| 114 | Care Retention.ab. or Care Retention.at.                                               | 212  |
| 115 | Transfer from Pediatric to Adult Care.ab. or Transfer from Pediatric to Adult Care.at. | 51   |
| 116 | Pediatric Transition To Adult Care.ab. or Pediatric Transition To Adult Care.at.       | 0    |
| 117 | Transfer* to Adult Care.ab. or Transfer* to Adult Care.at.                             | 283  |

|     |                                                                                                                                                                                                                                                                                                                                                                                                                                                                    |         |
|-----|--------------------------------------------------------------------------------------------------------------------------------------------------------------------------------------------------------------------------------------------------------------------------------------------------------------------------------------------------------------------------------------------------------------------------------------------------------------------|---------|
| 118 | Care*, Transitional.ab. or Care*, Transitional.at.                                                                                                                                                                                                                                                                                                                                                                                                                 | 64      |
| 119 | Transition* Care*.ab. or Transition* Care*.at.                                                                                                                                                                                                                                                                                                                                                                                                                     | 3611    |
| 120 | Home Transition*.ab. or Home Transition*.at.                                                                                                                                                                                                                                                                                                                                                                                                                       | 267     |
| 121 | Transition*, Home.ab. or Transition*, Home.at.                                                                                                                                                                                                                                                                                                                                                                                                                     | 485     |
| 122 | 50 or 51 or 52 or 53 or 54 or 55 or 56 or 57 or 58 or 59 or 60 or 61 or 62 or 63 or 64 or 65 or 66 or 67 or 68 or 69 or 70 or 71 or 72 or 73 or 74 or 75 or 76 or 77 or 78 or 79 or 80 or 81 or 82 or 83 or 84 or 85 or 86 or 87 or 88 or 89 or 90 or 91 or 92 or 93 or 94 or 95 or 96 or 97 or 98 or 99 or 100 or 101 or 102 or 103 or 104 or 105 or 106 or 107 or 108 or 109 or 110 or 111 or 112 or 113 or 114 or 115 or 116 or 117 or 118 or 119 or 120 or 121 | 2494522 |
| 123 | 22 and 48 and 122                                                                                                                                                                                                                                                                                                                                                                                                                                                  | 28675   |
| 124 | transition readiness.ab. or transition readiness.at.                                                                                                                                                                                                                                                                                                                                                                                                               | 406     |
| 125 | readiness.ab. or readiness.at.                                                                                                                                                                                                                                                                                                                                                                                                                                     | 24731   |
| 126 | read*.ab. or read*.at.                                                                                                                                                                                                                                                                                                                                                                                                                                             | 662970  |
| 127 | handiness.ab. or handiness.at.                                                                                                                                                                                                                                                                                                                                                                                                                                     | 81      |
| 128 | Preparation.ab. or Preparation.at.                                                                                                                                                                                                                                                                                                                                                                                                                                 | 346728  |
| 129 | Preparedness.ab. or Preparedness.at.                                                                                                                                                                                                                                                                                                                                                                                                                               | 19411   |
| 130 | Parar*.ab. or Parar*.at.                                                                                                                                                                                                                                                                                                                                                                                                                                           | 2800    |
| 131 | 124 or 125 or 126 or 127 or 128 or 129 or 130                                                                                                                                                                                                                                                                                                                                                                                                                      | 1016116 |
| 132 | 122 and 131                                                                                                                                                                                                                                                                                                                                                                                                                                                        | 92705   |
| 133 | 49 and 132                                                                                                                                                                                                                                                                                                                                                                                                                                                         | 938     |
